# Supplementary material for: Comparative Effectiveness of Bimekizumab and Guselkumab in Patients with Psoriatic Arthritis at 52 Weeks Assessed Using a Matching-Adjusted Indirect Comparison
Source: PubMed Central journal article supplement — Rheumatol Ther. 2024 Mar 15;11(3):829–39. doi: 10.1007/s40744-024-00659-0 (PMC11111623; doi:10.1007/s40744-024-00659-0), 2024-03-15
Supplement: 40744_2024_659_MOESM1_ESM.pdf [file 40744_2024_659_MOESM1_ESM.pdf]

# **Comparative Effectiveness of Bimekizumab and Guselkumab in Patients with Psoriatic Arthritis at 52-Weeks Assessed Using a Matching-Adjusted Indirect Comparison**

## **Supplementary Information**

Richard B. Warren<sup>1</sup>, Iain B. McInnes<sup>2</sup>, Peter Nash<sup>3</sup>, Jean-Marie Grouin<sup>4</sup>, Nikos Lyris<sup>5</sup>, Damon Willems<sup>6</sup>, Vanessa Taieb<sup>7</sup>, Jason Eells<sup>5</sup>, Philip J. Mease<sup>8</sup>

*<sup>1</sup>Dermatology Centre, Northern Care Alliance NHS Foundation Trust, The University of Manchester, Manchester Academic Health Science Centre, NIHR Manchester Biomedical Research Centre, Manchester, UK; <sup>2</sup>University of Glasgow, College of Medical Veterinary and Life Sciences, Glasgow, UK; <sup>3</sup>School of Medicine, Griffith University School of Medicine, Brisbane, Queensland, Australia; <sup>4</sup>University of Rouen, Rouen, France; <sup>5</sup>UCB Pharma, Slough, UK; <sup>6</sup>UCB Pharma, Brussels, Belgium; <sup>7</sup>UCB Pharma, Colombes, France; <sup>8</sup>Swedish Medical Center/Providence St. Joseph Health, and University of Washington, Seattle, WA, USA*

**Correspondence to:** Philip J. Mease ([pmease@phillipmease.com](mailto:pmease@phillipmease.com))  
Swedish Medical Center and Providence St. Joseph Health  
601 Broadway  
Seattle, WA 98122

**Key words:** ACR; bimekizumab; biologics; guselkumab, IL-17; IL-23; MAIC; MDA; psoriatic arthritis

**Prior Presentation:** The data in this manuscript was previously shared at the 32<sup>nd</sup> European Academy of Dermatology and Venereology Congress 2023, Berlin, Germany, 11-14 October 2023 (Poster No. P0757).

**Table S1. Pre- and post-matching adjustment baseline characteristics for bimekizumab-treated patients**

| Mean (SD)                          | vs guselkumab Q4W<br>(DISCOVER-2, bDMARD-naïve) |                 | vs guselkumab Q8W<br>(DISCOVER-2, bDMARD-naïve) |                 | vs guselkumab Q8W<br>(COSMOS, TNFi-IR) |                 |
|------------------------------------|-------------------------------------------------|-----------------|-------------------------------------------------|-----------------|----------------------------------------|-----------------|
|                                    | Pre-adjustment                                  | Post-adjustment | Pre-adjustment                                  | Post-adjustment | Pre-adjustment                         | Post-adjustment |
| <b>Age, years</b>                  | 48.73 (12.44)                                   | 45.90 (11.50)   | 48.73 (12.44)                                   | 44.90 (11.90)   | 50.11 (12.40)                          | 49.00 (12.00)   |
| <b>BMI score</b>                   | 29.22 (6.77)                                    | 30.32 (7.70)    | 29.22 (6.77)                                    | 30.27 (8.39)    | 30.16 (6.46)                           | 30.82 (7.04)    |
| <b>Dactylitis, %</b>               | 13 (33)                                         | 14 (35)         | 13 (33)                                         | 14 (35)         | 13 (33)                                | 12 (32)         |
| <b>Time since diagnosis, years</b> | 5.92 (7.30)                                     | 5.50 (7.00)     | 5.92 (7.30)                                     | 5.10 (6.27)     | 9.64 (9.88)                            | 8.30 (8.11)     |
| <b>Prior DMARD use, %</b>          | 71 (46)                                         | 71 (45)         | 71 (46)                                         | 69 (46)         | 52 (50)                                | 62 (49)         |
| <b>Enthesitis, %</b>               | 33 (47)                                         | 37 (48)         | 33 (47)                                         | 34 (47)         | 40 (49)                                | 45 (50)         |
| <b>HAQDI score</b>                 | 0.82 (0.59)                                     | 1.20 (0.55)     | 0.82 (0.59)                                     | 1.30 (0.53)     | 0.97 (0.59)                            | 1.30 (0.58)     |
| <b>Male, %</b>                     | 46 (50)                                         | 58 (49)         | 46 (50)                                         | 52 (50)         | 49 (50)                                | 46 (50)         |
| <b>MTX use, %</b>                  | 59 (49)                                         | 60 (49)         | 59 (49)                                         | 57 (50)         | 45 (50)                                | 56 (50)         |
| <b>BSA ≥3%, %</b>                  | 50 (50)                                         | 75 (43)         | 50 (50)                                         | 71 (45)         | 66 (0.48)                              | 70 (46)         |
| <b>SJC (of 66 joints)</b>          | 8.97 (6.01)                                     | 12.90 (9.06)    | 8.97 (6.01)                                     | 11.70 (8.19)    | 9.68 (7.53)                            | 10.00 (7.53)    |
| <b>TJC (of 68 joints)</b>          | 16.75 (11.69)                                   | 22.40 (14.19)   | 16.75 (11.69)                                   | 19.80 (12.48)   | 18.39 (13.57)                          | 21.00 (14.30)   |
| <b>VAS pain score</b>              | 53.66 (24.26)                                   | 64.06 (19.40)   | 53.66 (24.26)                                   | 65.05 (18.69)   | 58.49 (24.09)                          | 64.08 (21.91)   |
| <b>Weight, kg</b>                  | 84.71 (20.18)                                   | 89.54 (21.41)   | 84.71 (20.18)                                   | 88.05 (21.89)   | 87.57 (19.87)                          | 89.08 (21.55)   |
| <b>White (race), %</b>             | 95 (21)                                         | 96 (19)         | 95 (21)                                         | 97 (18)         | 96 (20)                                | 98 (15)         |

bDMARD, biologic disease-modifying anti-rheumatic drug; BMI, body mass index; BSA, body surface area; DMARD, disease-modifying anti-rheumatic drug; HAQ-DI, Health Assessment Questionnaire–Disability Index; MAIC, matching-adjusted indirect comparison; MTX, methotrexate; Q4W, every 4 weeks; Q8W, every 8 weeks; SD, standard deviation; SJC, swollen joint count; TJC, tender joint count; TNFi-IR, tumor necrosis factor inhibitor-inadequate response or intolerant; VAS, visual analog scale.

**Table S2. Unadjusted and adjusted response rates for bimekizumab (BE OPTIMAL) vs guselkumab (DISCOVER 2) at week 52 (bDMARD-naïve patient subgroup)**

| <b>BKZ 160 mg Q4W</b>                                    | <b>ACR20</b>            | <b>ACR50</b>                       | <b>ACR70</b>                       | <b>MDA</b>                         |
|----------------------------------------------------------|-------------------------|------------------------------------|------------------------------------|------------------------------------|
| <b>vs. GUS 100 mg Q4W</b>                                |                         |                                    |                                    |                                    |
| <b>GUS response rate – % (95% CI) (N=245)</b>            | 70.61<br>(64.88, 76.34) | 45.71<br>(39.45, 51.98)            | 26.12<br>(20.59, 31.65)            | 34.30<br>(28.33, 40.27)            |
| <b>BKZ unadjusted response rate - % (95% CI) (N=431)</b> | 71.23<br>(66.94, 75.52) | 54.52<br>(49.81, 59.24)            | 39.21<br>(34.59, 43.83)            | 54.99<br>(50.28, 59.70)            |
| <b>Unadjusted OR (95% CI)</b>                            | 1.03<br>(0.73, 1.46)    | 1.42<br>(1.04, 1.95)               | 1.82<br>(1.29, 2.58)               | 2.34<br>(1.69, 3.24)               |
| <b>BKZ ESS</b>                                           | 155.08                  | 155.08                             | 155.08                             | 155.08                             |
| <b>BKZ adjusted response rate - % (95% CI)</b>           | 72.28<br>(66.64, 77.92) | 57.71<br>(51.49, 63.93)            | 43.70<br>(37.46, 49.95)            | 48.76<br>(42.46, 55.05)            |
| <b>Adjusted OR (95% CI)</b>                              | 1.09<br>(0.68, 1.74)    | <b>1.62</b><br><b>(1.07, 2.44)</b> | <b>2.20</b><br><b>(1.43, 3.38)</b> | <b>1.82</b><br><b>(1.20, 2.76)</b> |
| <b>p-value</b>                                           | 0.734                   | <b>0.021</b>                       | <b>&lt;0.001</b>                   | <b>0.005</b>                       |
| <b>vs. GUS 100 mg Q8W</b>                                |                         |                                    |                                    |                                    |
| <b>GUS response rate – % (95% CI) (N=248)</b>            | 74.60<br>(69.16, 80.04) | 48.40<br>(42.15, 54.65)            | 27.80<br>(22.20, 33.40)            | 31.00<br>(25.22, 36.78)            |
| <b>BKZ unadjusted response rate - % (95% CI) (N=431)</b> | 71.23<br>(66.94, 75.52) | 54.52<br>(49.81, 59.24)            | 39.21<br>(34.59, 43.83)            | 54.99<br>(50.28, 59.70)            |
| <b>Unadjusted OR (95% CI)</b>                            | 0.84<br>(0.59, 1.20)    | 1.28<br>(0.93, 1.75)               | 1.68<br>(1.19, 2.35)               | 2.72<br>(1.95, 3.78)               |
| <b>BKZ ESS</b>                                           | 142.04                  | 142.04                             | 142.04                             | 142.04                             |
| <b>BKZ adjusted response rate – % (95% CI)</b>           | 71.69<br>(65.75, 77.63) | 56.35<br>(49.81, 62.89)            | 44.42<br>(37.87, 50.97)            | 48.14<br>(41.55, 54.73)            |
| <b>Adjusted OR (95% CI)</b>                              | 0.86<br>(0.53, 1.40)    | 1.38<br>(0.90, 2.09)               | <b>2.08</b><br><b>(1.34, 3.22)</b> | <b>2.07</b><br><b>(1.35, 3.17)</b> |
| <b>p-value</b>                                           | 0.548                   | 0.135                              | <b>0.001</b>                       | <b>&lt;0.001</b>                   |

Trial populations adjusted for: age, sex, BSA≥3%, HAQ-DI, MTX, SJC, TJC. ACR, American College of Rheumatology; ACR20/50/70, at least a 20/50/70% improvement according to the ACR response criteria; bDMARD, biologic disease modifying anti-rheumatic drug; BKZ, bimekizumab; BSA, body surface area; CI, confidence interval; ESS, effective sample size; GUS, guselkumab; HAQ-DI, Health Assessment Questionnaire Disability Index; MDA, minimal disease activity; MTX, methotrexate; OR, odds ratio; Q4W, every 4 weeks; Q8W, every 8 weeks; SJC, swollen joint count; TJC, tender joint count.

**Table S3. Unadjusted and adjusted response rates for bimekizumab (BE COMPLETE/BE VITAL) vs guselkumab (COSMOS) at week 52 (TNFi-IR patient subgroup)**

| <b>BKZ 160 mg Q4W</b>                                    | <b>ACR20</b>                 | <b>ACR50</b>                 | <b>ACR70</b>                 | <b>MDA</b>                   |
|----------------------------------------------------------|------------------------------|------------------------------|------------------------------|------------------------------|
| <b>vs. GUS 100 mg Q8W</b>                                |                              |                              |                              |                              |
| <b>GUS response rate – % (95% CI) (N=189)</b>            | 57.67<br>(50.58, 64.76)      | 39.15<br>(32.15, 46.16)      | 23.81<br>(17.70, 29.92)      | 26.98<br>(20.61, 33.35)      |
| <b>BKZ unadjusted response rate - % (95% CI) (N=267)</b> | 68.16<br>(62.55, 73.78)      | 51.69<br>(45.66, 57.71)      | 35.58<br>(29.81, 41.35)      | 47.19<br>(41.18, 53.21)      |
| <b>Unadjusted OR (95% CI)</b>                            | 1.57<br>(1.07, 2.32)         | 1.66<br>(1.14, 2.43)         | 1.77<br>(1.16, 2.69)         | 2.42<br>(1.62, 3.62)         |
| <b>BKZ ESS</b>                                           | 180.84                       | 180.84                       | 180.84                       | 180.84                       |
| <b>BKZ adjusted response rate - % (95% CI)</b>           | 70.66<br>(64.56, 76.76)      | 50.06<br>(43.36, 56.76)      | 34.13<br>(27.78, 40.48)      | 41.94<br>(35.33, 48.55)      |
| <b>Adjusted OR (95% CI)</b>                              | <b>1.77<br/>(1.15, 2.72)</b> | <b>1.56<br/>(1.03, 2.36)</b> | <b>1.66<br/>(1.05, 2.61)</b> | <b>1.95<br/>(1.27, 3.02)</b> |
| <b>p-value</b>                                           | <b>0.010</b>                 | <b>0.037</b>                 | <b>0.028</b>                 | <b>0.003</b>                 |

Trial populations adjusted for: age, sex, BSA $\geq$ 3%, HAQ-DI, MTX, SJC, TJC. ACR, American College of Rheumatology; ACR20/50/70, at least a 20/50/70% improvement according to the ACR response criteria; BKZ, bimekizumab; BSA, body surface area; CI, confidence interval; ESS, effective sample size; GUS, guselkumab; HAQ-DI, Health Assessment Questionnaire Disability Index; MDA, minimal disease activity; MTX, methotrexate; OR, odds ratio; Q4W, every 4 weeks; Q8W, every 8 weeks; SJC, swollen joint count; TJC, tender joint count, TNFi-IR, tumor necrosis factor inhibitor-inadequate response or intolerant.
